# Supplementary material for: Bromodomain and extra-terminal domain (BET) proteins regulate melanocyte differentiation
Source: Springer Nature journal article supplement (doi:10.1186/s13072-020-00333-z), 2020-03-10

**Fig. S1**

**Day 0**

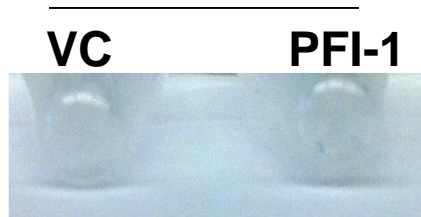

**Day 1**

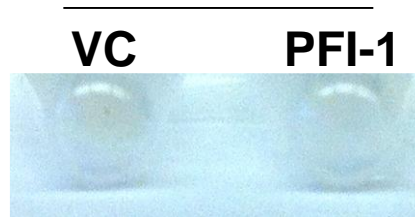

**Day 2**

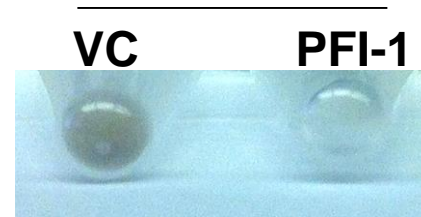

**Day 3**

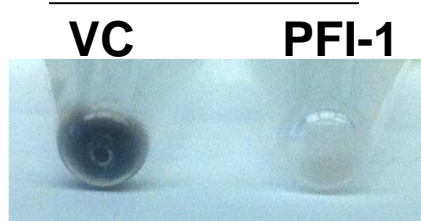

**Day 4**

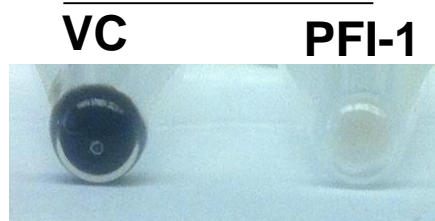

**Day 5**

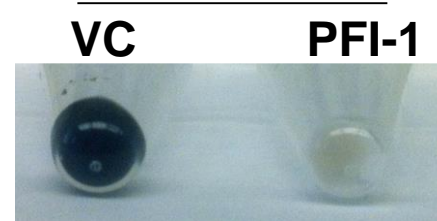

Supplement: MOESM1 [file 13072_2020_333_MOESM1_ESM.pdf › 13072_2020_333_MOESM1_ESM.pdf]
