# Supplementary material for: Bromodomain and extra-terminal domain (BET) proteins regulate melanocyte differentiation
Source: Springer Nature journal article supplement (doi:10.1186/s13072-020-00333-z), 2020-03-10

## A. JQ1 vs Vehicle

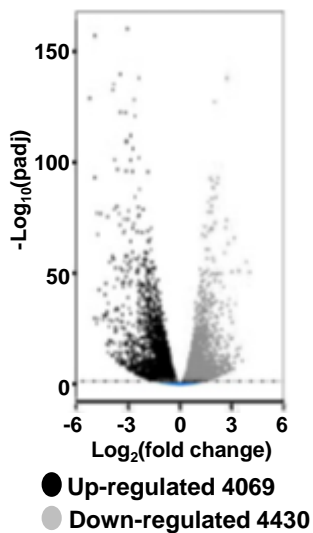

## B. Up-regulated

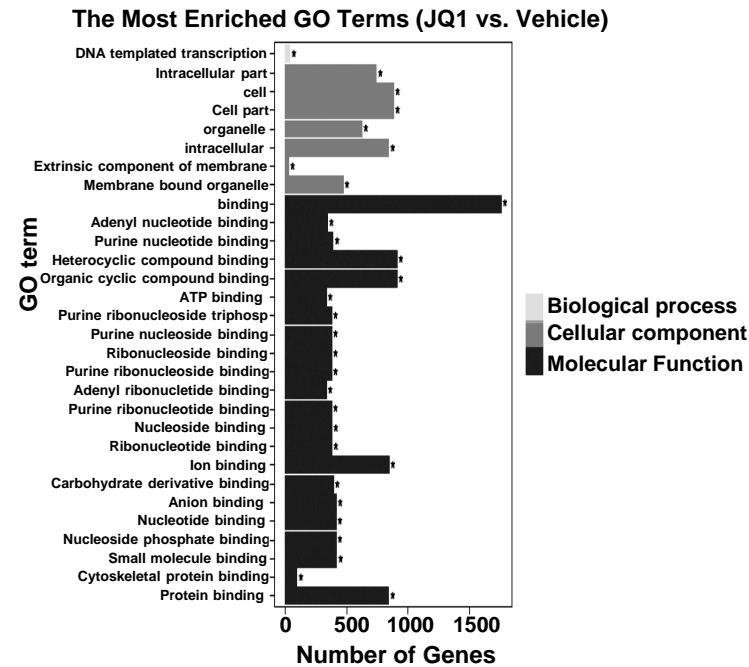

## C. Down-Regulated

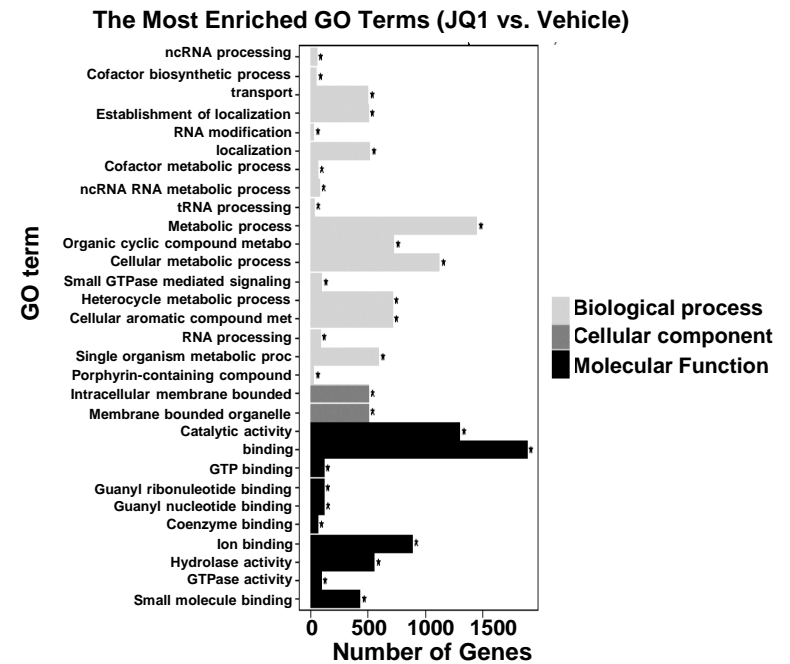

**D. Up-Regulated**  
**Statistics of Pathway Enrichment**

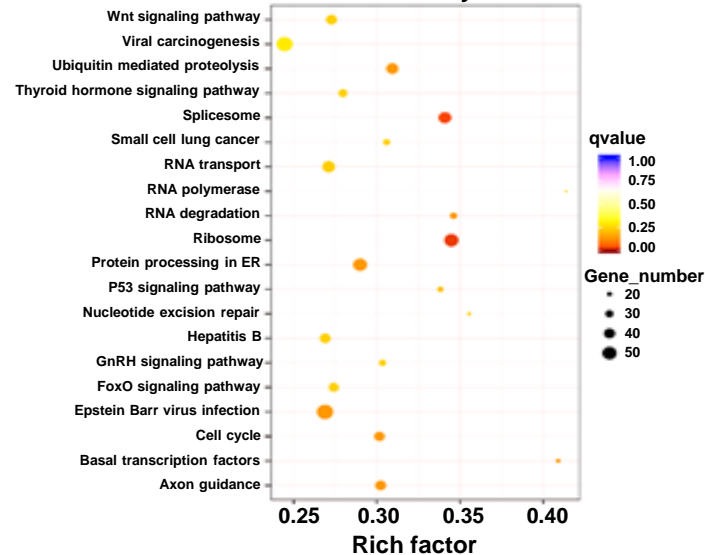

**E. Down-Regulated**  
**Statistics of Pathway Enrichment**

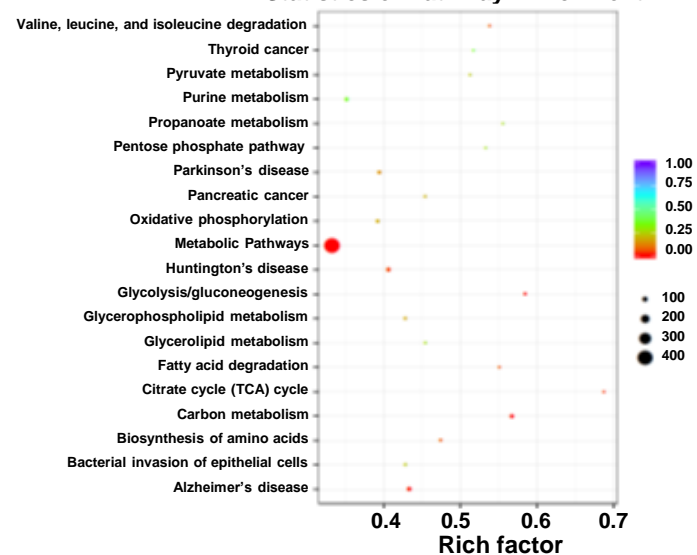

Supplement: MOESM3 [file 13072_2020_333_MOESM3_ESM.pdf › 13072_2020_333_MOESM3_ESM.pdf]
