# Supplementary material for: Bromodomain and extra-terminal domain (BET) proteins regulate melanocyte differentiation
Source: Springer Nature journal article supplement (doi:10.1186/s13072-020-00333-z), 2020-03-10

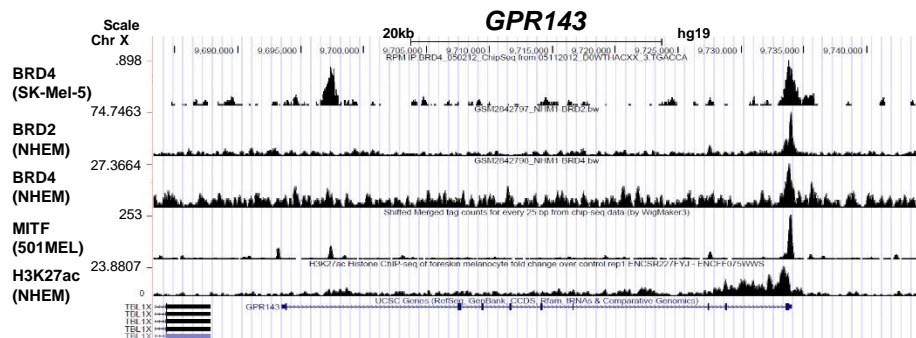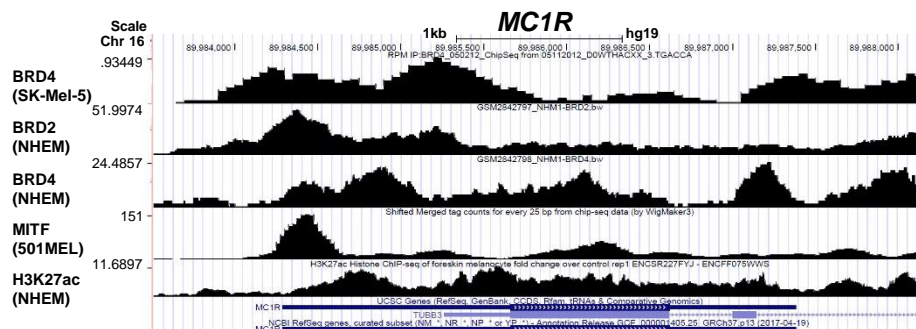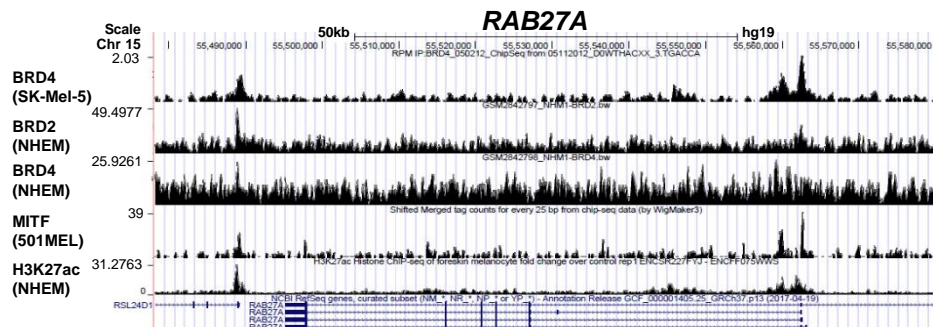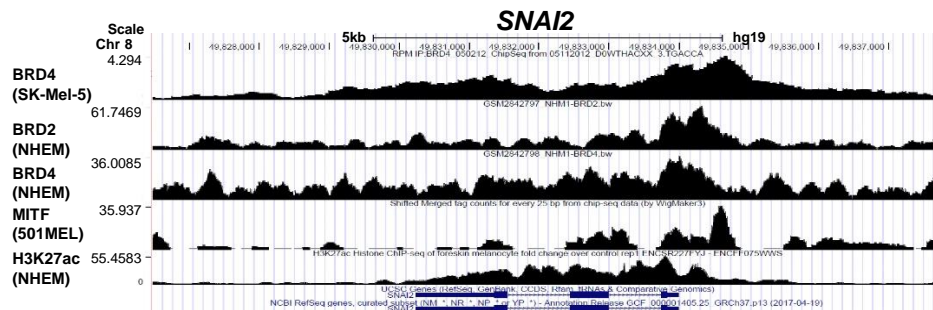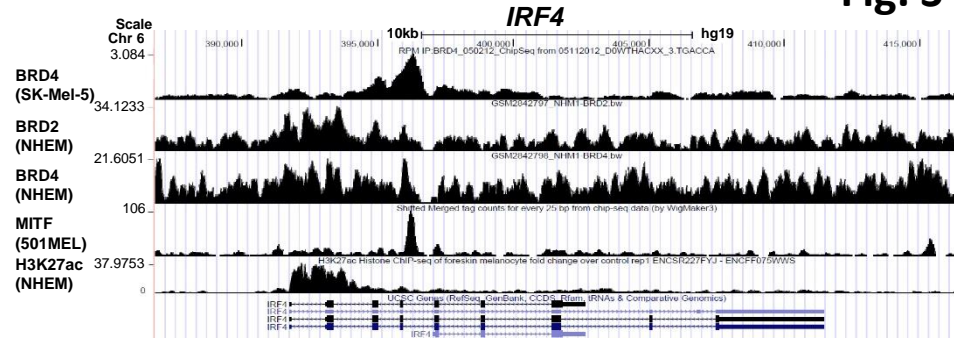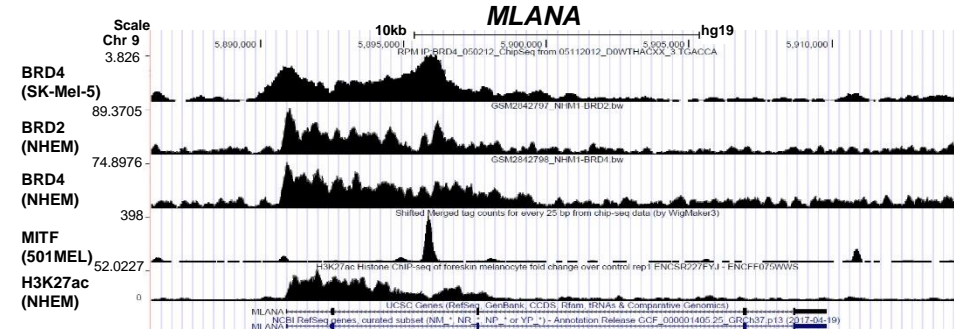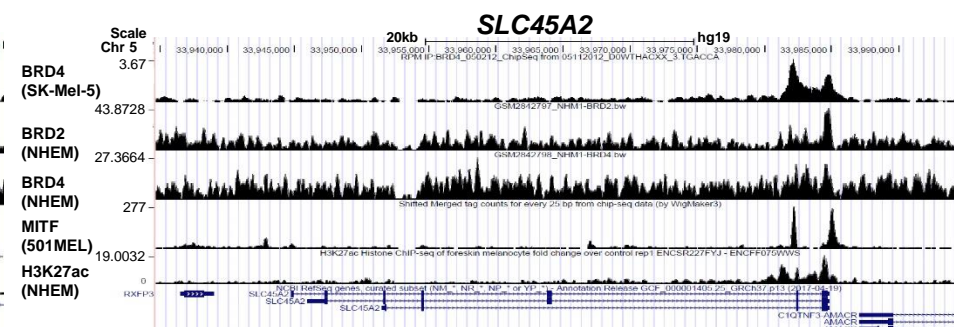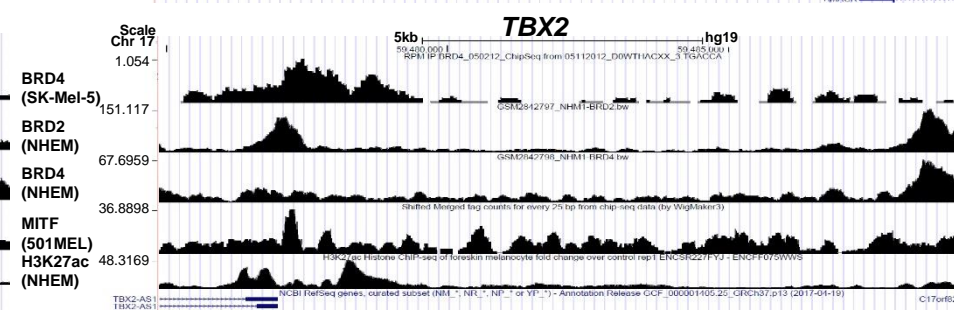

Supplement: MOESM6 [file 13072_2020_333_MOESM6_ESM.pdf › 13072_2020_333_MOESM6_ESM.pdf]
